# Supplementary material
Source: Springer Nature journal article supplement (https://www.springermedizin.de/resource/supplementary/12891_2013_1832_MOESM1_ESM.pdf/9508596)
Supplement: MOESM1 [file 9508596]

Population-based postal questionnaire (Q1)  
Inhabitants 40-79 years old (birth years: 1931-70)

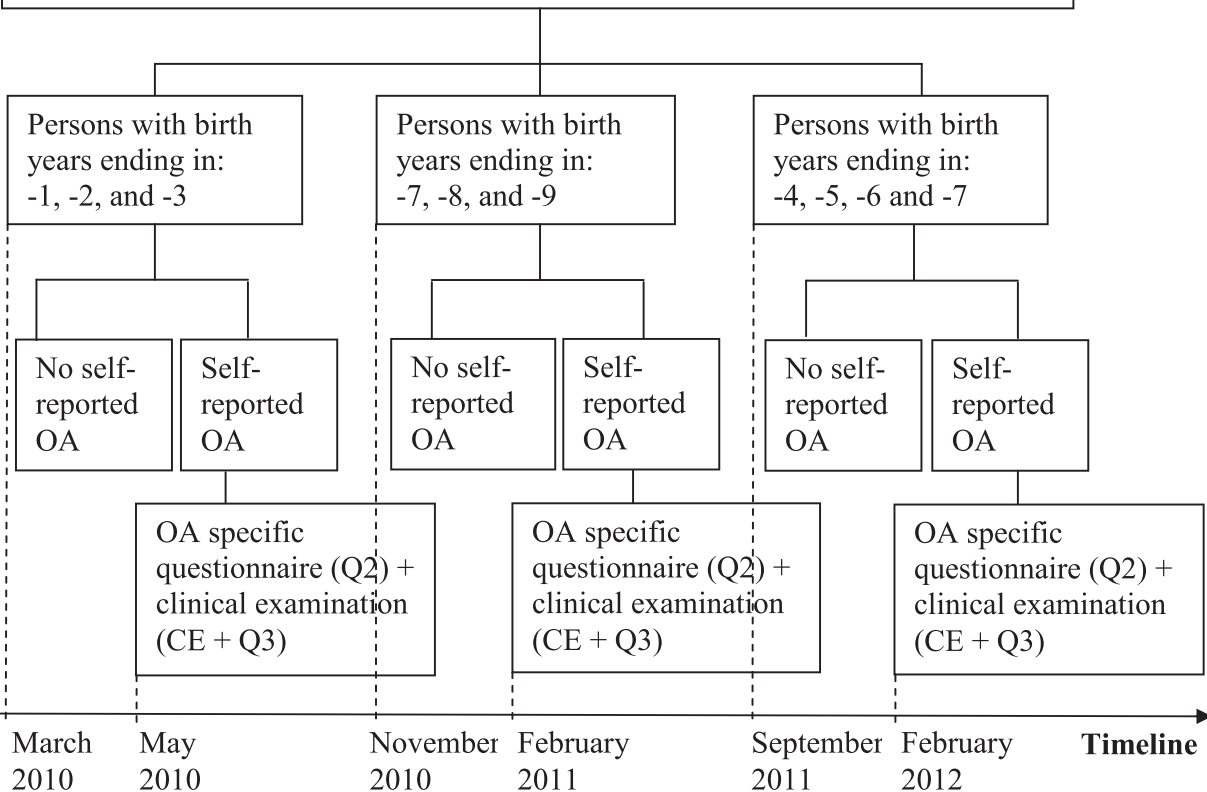

Q1: Population-based postal survey to the adult population

Q2: OA specific questionnaire

Q3: Questionnaire filled in during the clinical examination

CE: Clinical examination
